# Supplementary material for: Expression of the Ebola Virus VP24 Protein Compromises the Integrity of the Nuclear Envelope and Induces a Laminopathy-Like Cellular Phenotype
Source: PubMed Central journal article supplement (PMC8406168; doi:10.1128/mbio.00972-21), 2021-07-06

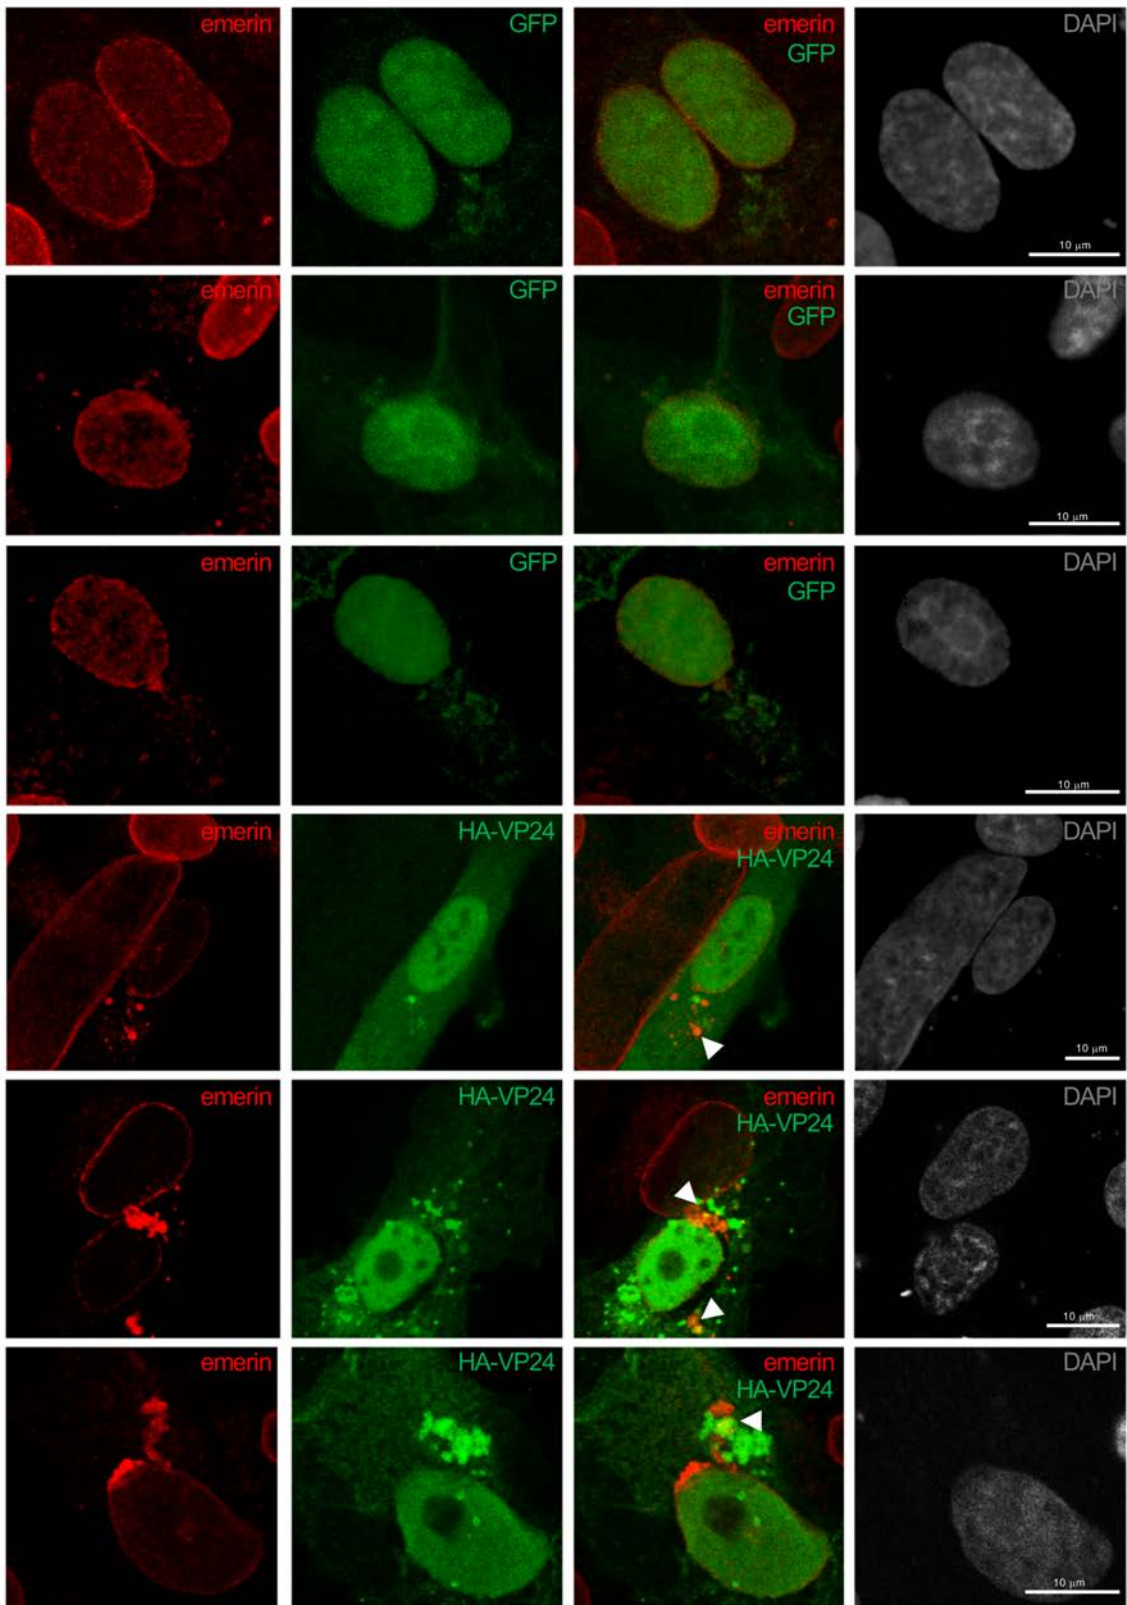

Supplement: mbio.00972-21-sf001.pdf [file mbio.00972-21-sf001.pdf]
